# Supplementary material for: Conjugating curcumin to water soluble polymer stabilized gold nanoparticles via pH responsive succinate linker
Source: Royal Society of Chemistry journal article supplement (doi:10.1039/c4tb01731e), 2014-11-19
Supplement: c4tb01731e1.pdf [file c4tb01731e1.pdf]

## Conjugating Curcumin to Water Soluble Polymer Stabilized Gold Nanoparticles *via* pH Responsive Succinate Linker

Soma Dey and K. Sreenivasan\*

Laboratory for Polymer Analysis, Biomedical Technology Wing, Sree Chitra Tirunal Institute for Medical Sciences and Technology, Poojappura, Trivandrum 695012, India

### Supplementary Information

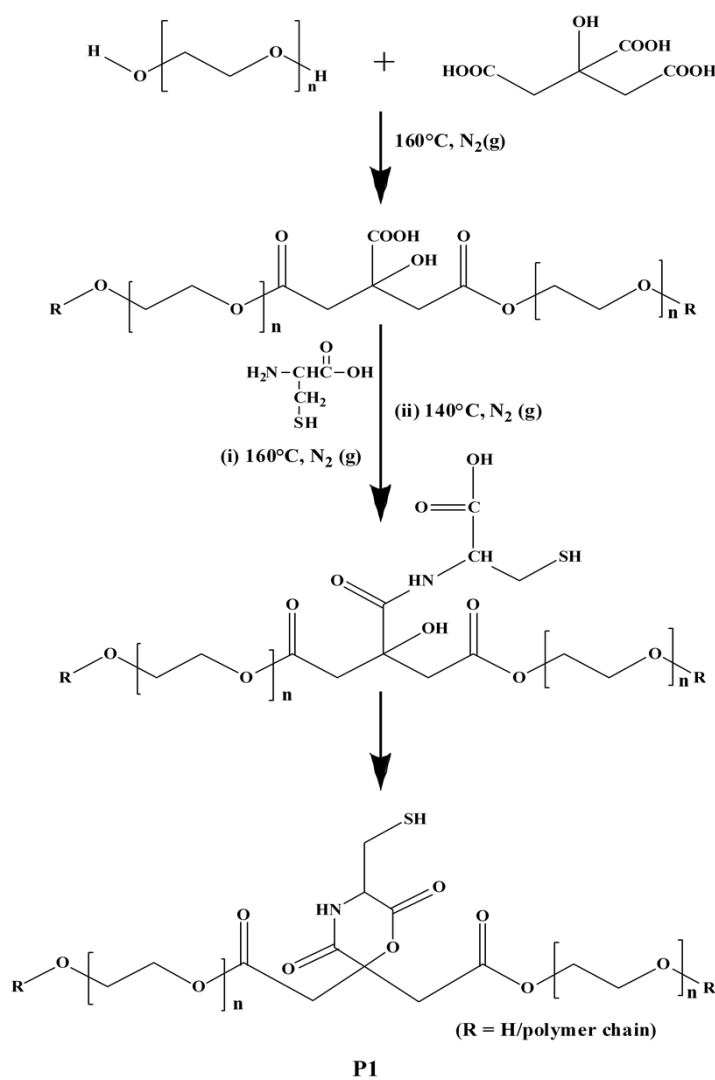

Fig. S1 Schematic presentation of the synthesis of P1.

**Table S1.** Molecular weights of P1 by GPC

| $M_n$ | $M_w$ | MP   | PDI   |
|-------|-------|------|-------|
| 1533  | 2174  | 1932 | 1.418 |

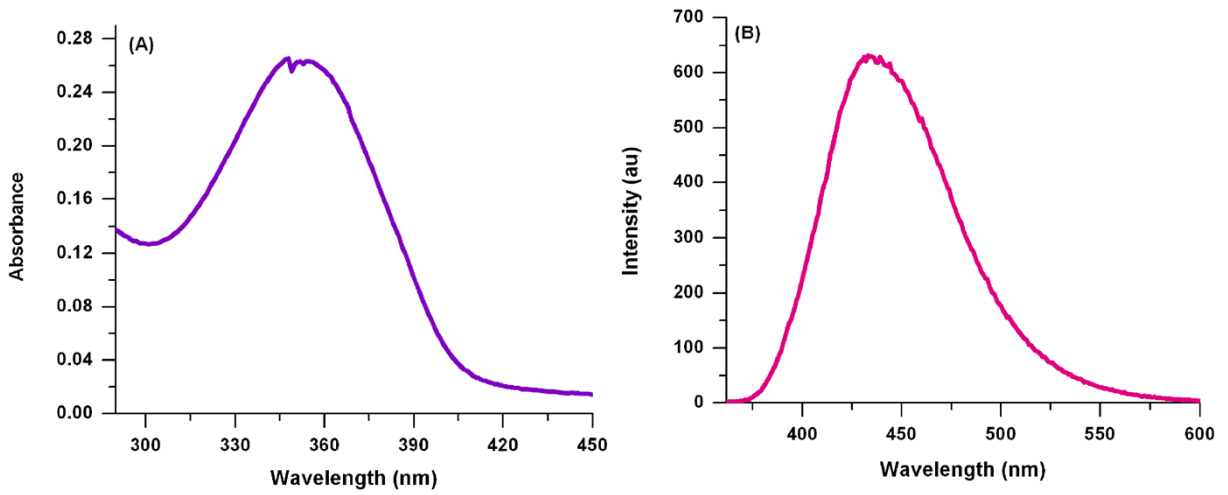

**Fig. S2** (A) UV-Vis absorption spectrum of P1 (B) Fluorescence emission spectrum of P1.

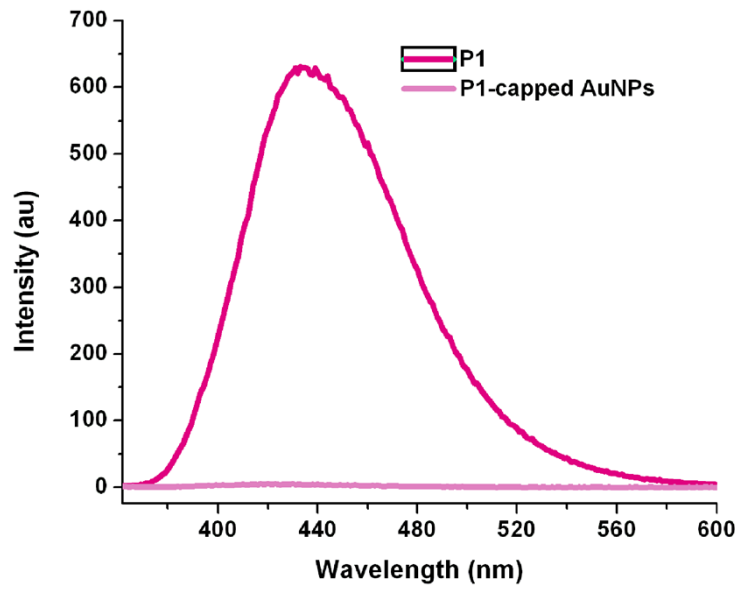

**Fig. S3** Fluorescence spectra of P1 and P1-capped AuNPs showing fluorescence quenching of P1 after conjugation onto the surface of AuNPs.

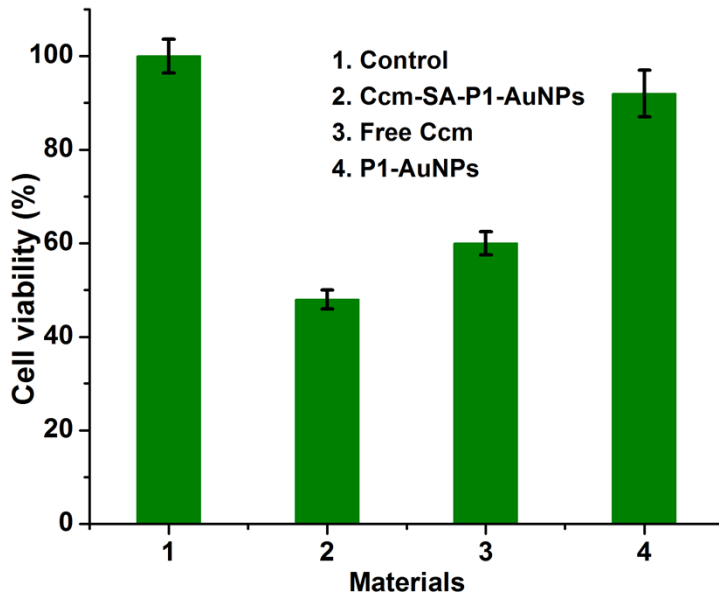

**Fig. S4.** Plot of cell viability (%) of C6 cancer cells after interaction with (1) control (medium without any AuNPs) (2) Ccm-SA-P1-AuNPs (with equivalent Ccm concentration of 15  $\mu$ M) (3) Free Ccm (15  $\mu$ M) and (4) P1-AuNPs (concentration equivalent to the concentration of Ccm-SA-P1-AuNPs).
